# Supplementary material for: Identification of renin progenitors in the mouse bone marrow that give rise to B-cell leukaemia
Source: PubMed Central journal article supplement — Nat Commun. 2014 Feb 18;5:3273. doi: 10.1038/ncomms4273 (PMC3929784; doi:10.1038/ncomms4273), 2014-02-18
Supplement: ncomms4273-s1.pdf [file ncomms4273-s1.pdf]

**SUPPLEMENTARY INFORMATION**

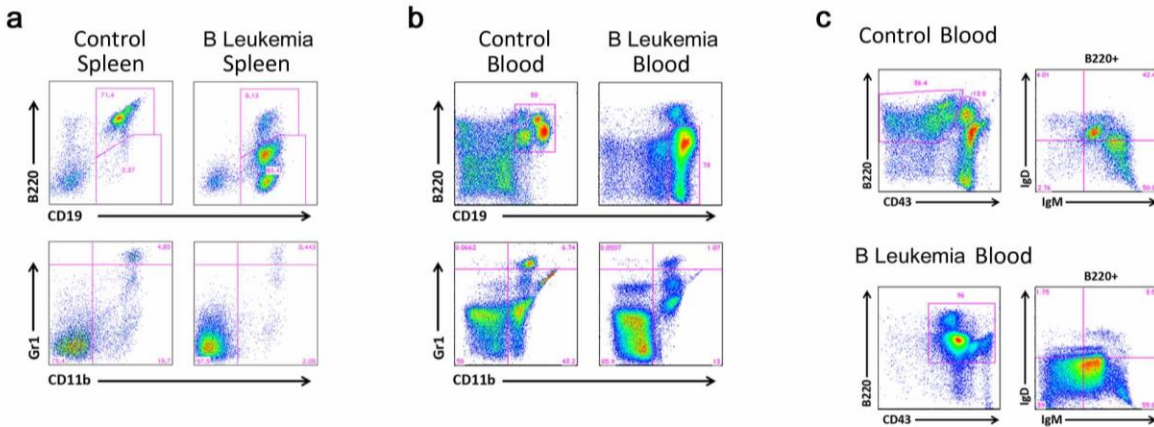

**Supplementary Figure 1. Flow cytometric analysis of spleens and peripheral blood confirms expansion of aberrant B lymphoblasts in mutant mice.**

(a) Spleen cells from control animals (left column) consists of 71% phenotypically normal B-cells ( $B220^+CD19^+$ ) (top), ~5% granulocytes ( $Gr1^+CD11b^+$ )(bottom), and ~20% monocytes ( $Gr1^-CD11b^+$ ). In spleen cells from leukemic mice (right column), there is replacement of normal B-cells (0.13%), granulocytes (0.4%), and monocytes (2%) with an expanded population of lymphoblasts (83%) which have aberrant dim B220 expression ( $B220^{Dim}CD19^+$ ). (b) In addition, the peripheral blood of mutant animals consists mostly (78%) of aberrant B-lymphoblasts which have  $B220^{Dim}$  expression (right column) and less granulocytes (1%) and immature myeloid cells (13%) than control animals (left column). (c) Blood from control animals show low CD43 expression (pro-B-cell marker) and almost all B-cells express IgM and/or IgD. However, blood cells from mutant animals retain CD43 expression and have less IgM/IgD expression, demonstrating an arrest in maturation and consistent with the results of bone marrow studies.

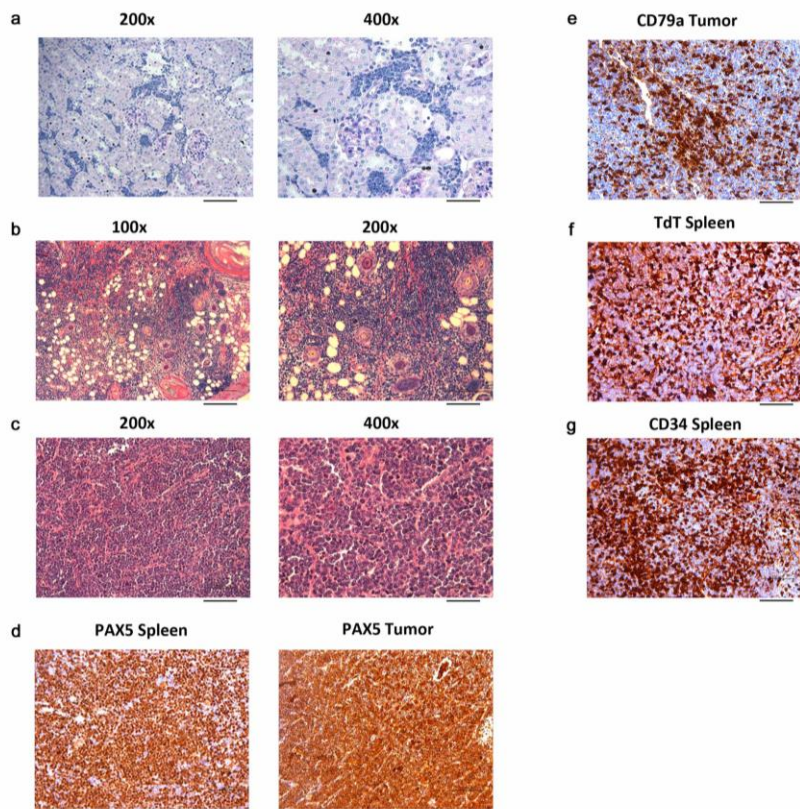

**Supplementary Figure 2. Histological characterization of leukemic animals.**

(a) Hematoxylin and eosin (H+E) stainings at low (left) and high (right) magnification demonstrating infiltration of lymphoblasts in kidney. Scale bars equal 100  $\mu\text{m}$  for 200x magnification and 50  $\mu\text{m}$  for 400x magnification. (b) H+E staining of skin at low and high power. Scale bars equal 200  $\mu\text{m}$  for 100x magnification and 100  $\mu\text{m}$  for 200x magnification. (c) H+E staining of tumor sections. Scale bars equal 100  $\mu\text{m}$  for 200x magnification and 50  $\mu\text{m}$  for 400x magnification. (d) Pax5 staining of a leukemic spleen and tumor demonstrating intense staining consistent with B-cell lineage. Scale bars equal 100  $\mu\text{m}$ . (e) CD79a staining of tumor sample demonstrating heterogeneous staining, again consistent with a B-cell lineage. Scale bar equals 100  $\mu\text{m}$ . (f) TdT staining of leukemic spleen showing infiltration of cells positive for TdT, indicating a precursor population. Scale bar equals 100  $\mu\text{m}$ . (g) CD34 staining of leukemic spleen showing infiltration of cells positive for CD34, again suggesting a precursor population. Scale bar equals 100  $\mu\text{m}$ .

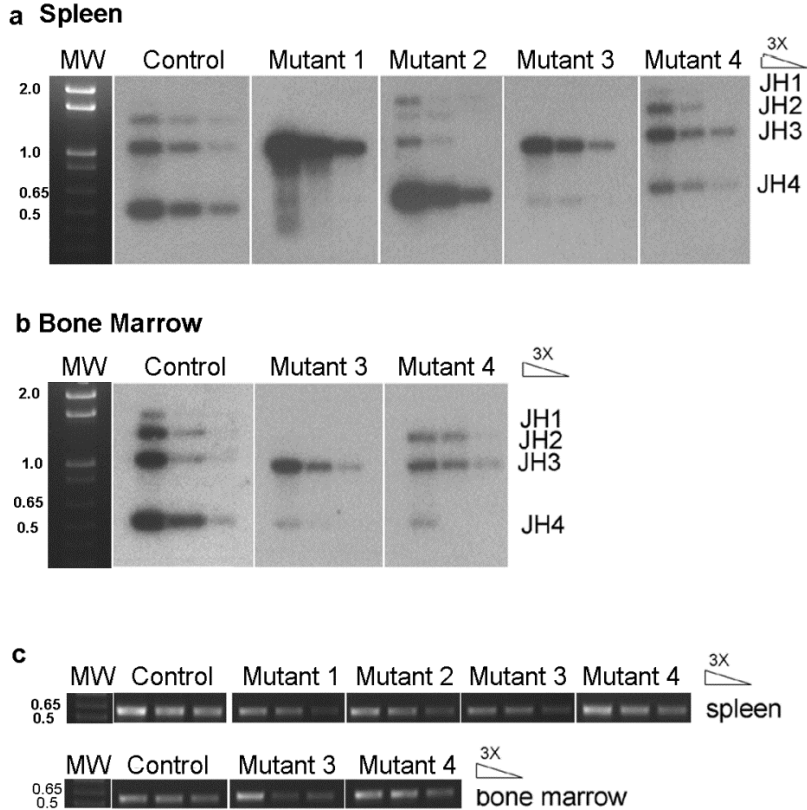

**Supplementary Figure 3. V(D)J recombination in control and leukemic mice.**

(a-c) Genomic DNA from control and mutant leukemic spleens and bone marrow was isolated and 3-fold dilutions were subjected to PCR analysis. IgH V(D)J recombination was assessed using a reverse primer downstream of JH4 and a forward primer recognizing the VH7183 family. PCR products were blotted and hybridized with the JH4 probe. Rearrangements can occur to JH1, JH2, JH3, or JH4. (a) Spleen samples from all of the mutants exhibit mono or oligo clonal rearrangements. Mutant 1 shows one rearrangement event while Mutant 3 shows two, with JH3 being the predominant recombinant. Mutant 2 has predominantly JH4 and Mutant 4 has reduced JH4. (b) In bone marrow samples, Mutants 3 and 4 have recombination patterns similar to that found in the spleens. (c) DNA input was normalized to DLG5 PCR product. MW: The molecular weight ladder on the ethidium bromide stained gel before transfer with band sizes indicated in kb.

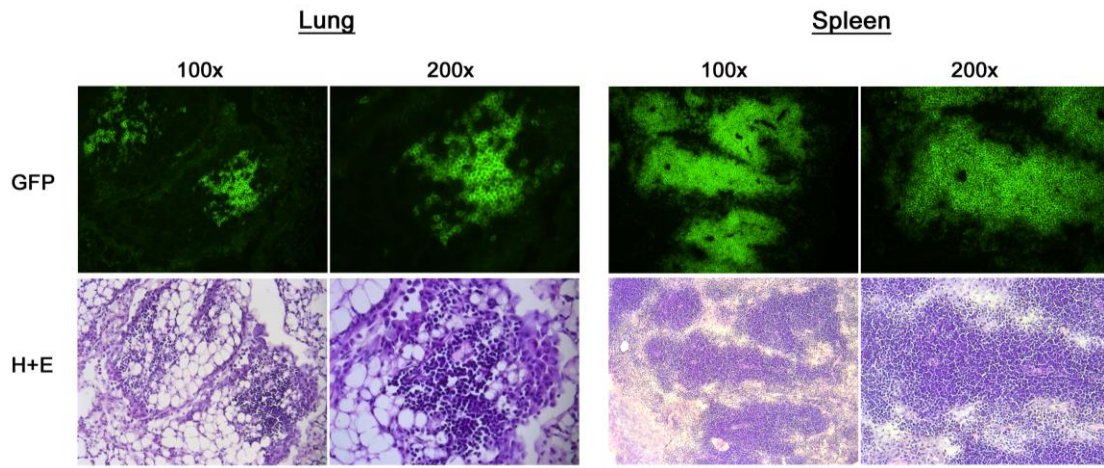

**Supplementary Figure 4. Transplanted leukemic cells infiltrate recipient organs.**

Transplanted leukemic cells, which express GFP, infiltrate numerous organs of irradiated mice including the lung (left panel) and spleen (right panel). Scale bars equal 200  $\mu\text{m}$  for 100x magnification and 100  $\mu\text{m}$  for 200x magnification.

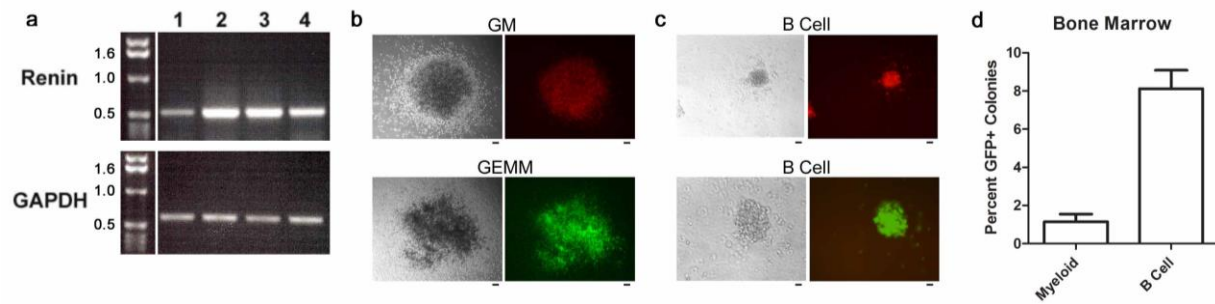

**Supplementary Figure 5. Renin is actively expressed in bone marrow precursors.**

(a) RT-PCR for renin and GAPDH from bone marrow samples of 4 wildtype mice (1-4) demonstrating the presence of renin mRNA in cells from the bone marrow. (b-d) Methycellulose colony assays of bone marrow cells from *Ren1<sup>dcre/+</sup>;mT/mG* mice. (b) Example of a RFP<sup>+</sup> (renin-lineage negative) GM colony (top) and a GFP<sup>+</sup> (renin-lineage positive) GEMM colony grown in conditions permissive to myeloid/erythroid precursors. Scale bars equal 100  $\mu$ m. (c) Examples of RFP<sup>+</sup> (top) and GFP<sup>+</sup> (bottom) colonies grown in conditions permissive to pre-B precursors. Scale bars equal 25  $\mu$ m (top) and 12.5  $\mu$ m (bottom). (d) Quantification of the number of colonies derived from renin precursors (GFP<sup>+</sup>) showed a higher percentage of GFP<sup>+</sup> colonies in media permissive to B cell growth. Error bars are SEM (n=6 for each group).

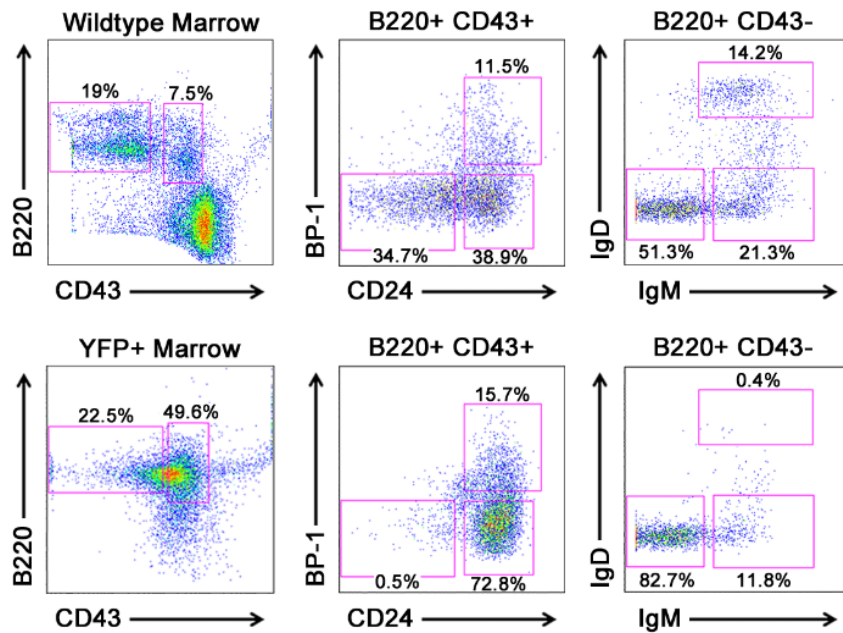

**Supplementary Figure 6. Renin expression during B cell development.**

Renin-expressing cells from the bone marrow of *Ren1<sup>c</sup>-YFP* transgenic mice were sorted and stained with fluorescently-labelled antibodies to B220, CD43, BP-1, CD24, IgD, and IgM. Wildtype bone marrow was used as a control. YFP<sup>+</sup> bone marrow cells demonstrated increased expression of B220<sup>+</sup>CD43<sup>+</sup> cells compared to wildtype (left column). B220<sup>+</sup>CD43<sup>+</sup> cells were assessed for expression of BP-1 and CD24 (middle column), representing Hardy Fraction A (BP-1<sup>-</sup>CD24<sup>-</sup>), B (BP-1<sup>-</sup>CD24<sup>+</sup>), and C (BP-1<sup>+</sup>CD24<sup>+</sup>). Similarly, B220<sup>+</sup>CD43<sup>-</sup> cells were assessed for expression of IgM and IgD (right column), corresponding to Hardy Fraction D (IgM<sup>-</sup>IgD<sup>-</sup>), E (IgM<sup>+</sup>IgD<sup>-</sup>), and F (IgM<sup>+</sup>IgD<sup>+</sup>). Compared to wildtype bone marrow, YFP<sup>+</sup> bone marrow cells had a higher frequency of Hardy Fraction B subset, suggesting that renin-expressing cells are pro-B cells.

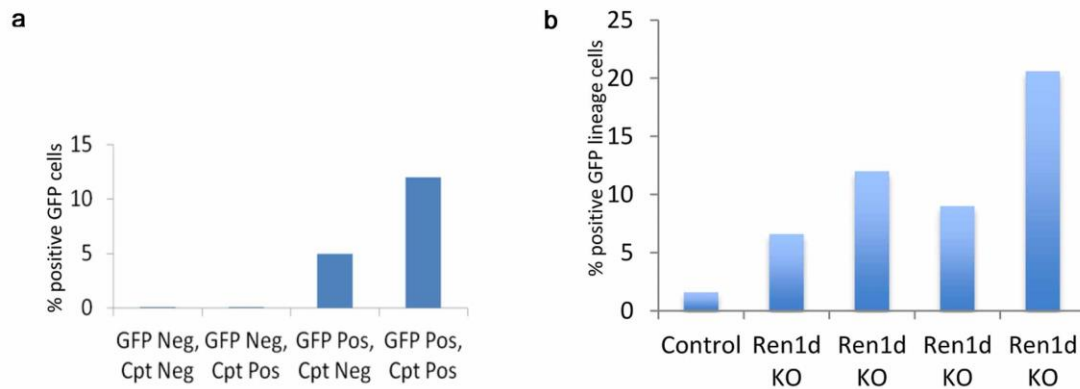

**Supplementary Figure 7. Renin progenitors increase in number in response to homeostatic stress.**

(a) Quantification of GFP cells from the bone marrow of *Bac-Ren1<sup>c</sup>-GFP* transgenic mice. Captopril treatment results in increased GFP expression demonstrating that physiological stress results in recruitment of renin-expressing cells in the bone marrow. Bars denote results from individual animals.

(b) Similarly, homozygous replacement of the *Ren1* locus with *Cre recombinase* (*Ren1<sup>d</sup> KO*) results in recruitment of renin expression and thus increased GFP expression in the peripheral blood. Bars indicate the average of measurements done in triplicate from individual animals.

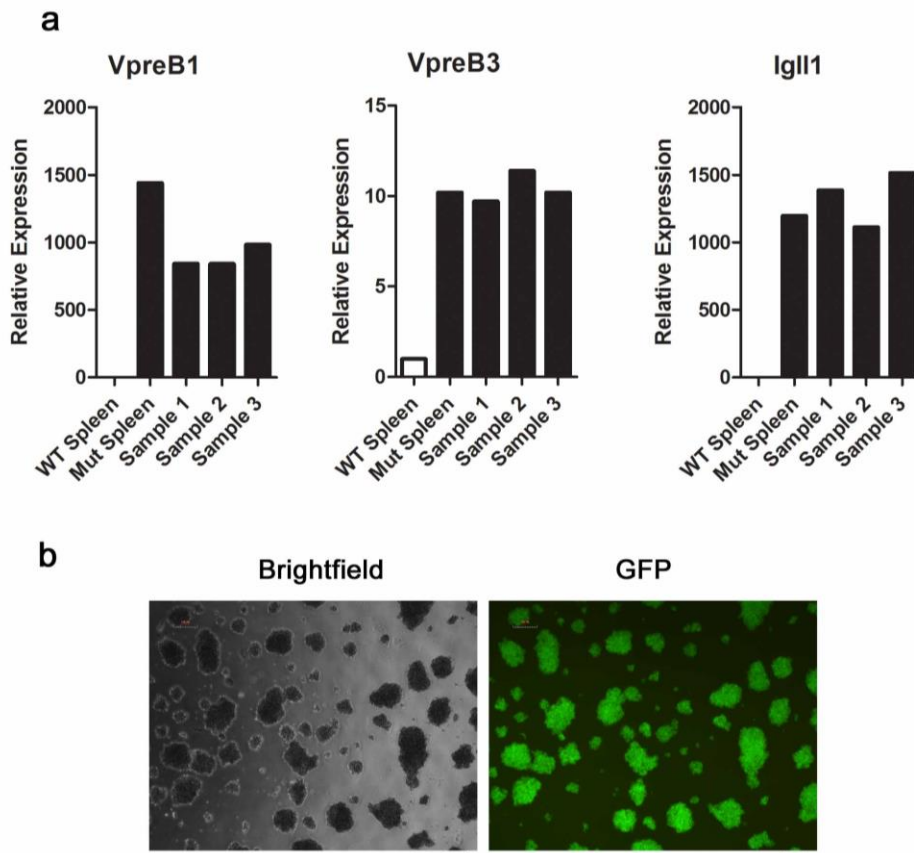

**Supplementary Figure 8. Gene expression of leukemic cell lines.**

(a) qRT-PCR of differentially expressed genes in RNA from control and mutant spleens compared to 3 leukemic cell samples derived from the bone marrow of the same mutant mouse and grown independently in culture. RNA was isolated from cells at passage 4. Genes important for early B cell development are upregulated in the cell samples, similar to the whole spleen, n=3 for leukemic cells.

(b) All cell colonies were GFP<sup>+</sup>, confirming that these cells represented a homogeneous population. Scale bars equal 100  $\mu$ m.



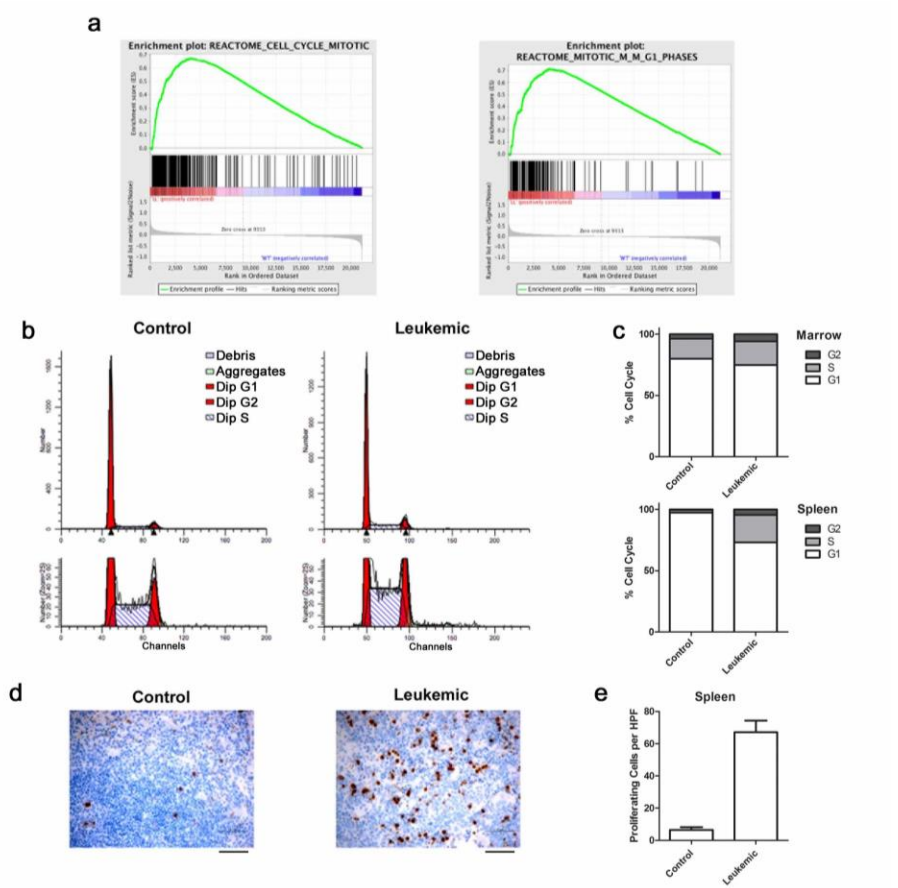

**Supplementary Figure 9. Deletion of *RBP-J* in renin-lineage cells leads to enhanced cell cycle progression and increased cell proliferation.**

(a) Gene set enrichment analysis was performed on microarray data comparing control and leukemic spleens. The top two differentially expressed gene signatures include “Cell cycle mitotic” and “Mitotic M-M/G1 phases”. (b) Formal cell cycle analysis was performed on bone marrow and spleen from control (left) versus leukemic (right) mice. (c) Leukemic mice had increased percentage of cells in S and G2 phase compared to control mice. (d) Phosphohistone H3 immunohistochemistry was performed to evaluate cell proliferation on spleen samples from control and leukemic mice. Scale bars equal 50  $\mu$ m. (e) Phosphohistone H3 immunohistochemistry demonstrated increased cellular proliferation in mice with B-cell leukemia versus mice control mice. Error bars represent SEM (n=4 for control animals and n=8 for leukemic animals).

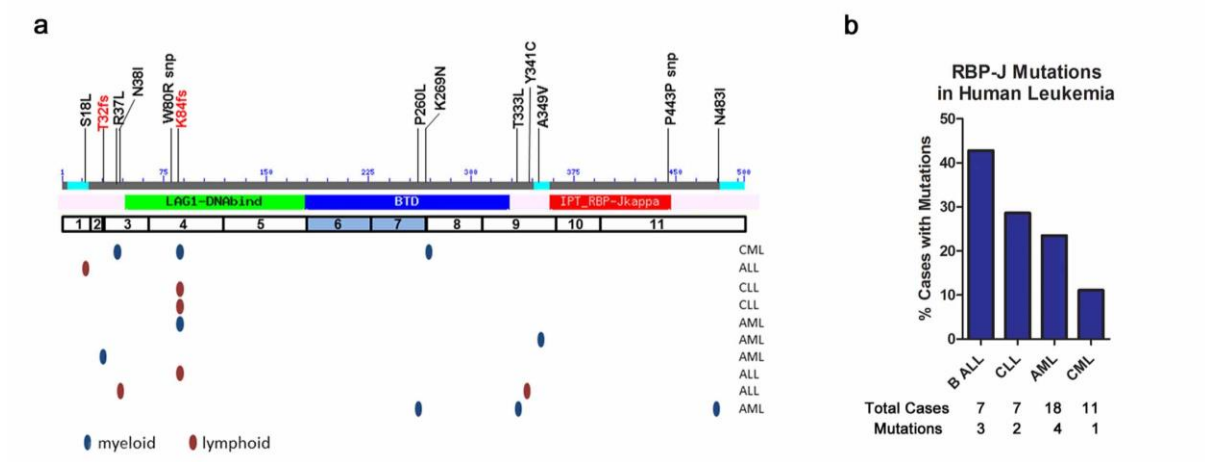

**Supplementary Figure 10. *RBP-J* variants occur in human hematopoietic malignancies.**

(a) Schematic representation of the *RBP-J* gene and protein structure with domains and exons indicated. Exons 6 and 7 represent the region that is deleted in our study mice. The location of discovered *RBP-J* variants and resulting amino acid changes are denoted by a small oval (red for B-lymphoid malignancies and blue for myeloid malignancies) at their position on the *RBP-J* gene, and the diagnosis for that patient is listed to the right. Two known single nucleotide polymorphisms are included for reference. The most common variant was a frameshift deletion which occurred at position 188 of the coding region within the LAG1-DNA binding domain (exon 4). (b) The frequency of *RBP-J* variants within distinct hematologic malignancies. 44 leukemia samples were analyzed including 7 B-ALL, 7 CLL, 18 AML, 11 CML, and 1 mixed leukemia (which did not have an *RBP-J* variant and is not included in this graph).

**Supplementary Table 1. Stage of B cell development of Renin-lineage and Renin-expressing cells**

|                         | <b>Common Lymphocyte Progenitor</b> | <b>Pro B Cell</b> | <b>Premature B Cell</b> | <b>Immature B Cell</b> | <b>Mature B Cell</b> |
|-------------------------|-------------------------------------|-------------------|-------------------------|------------------------|----------------------|
| <b>Renin Expressing</b> | 3.01% ± 1.76                        | 72.9% ± 8.4       | 16.9% ± 6               | 8.65% ± 1.85           | 0.92% ± 0.03         |
| <b>Renin Lineage</b>    | .014% ± 0.01                        | 4.51% ± 0.44      | 37.15% ± 4.35           | 25.5% ± 1.2            | 28.75% ± 5.15        |

Data is presented as mean ± SEM, n=2 for all conditions.

**Supplementary Table 2. Gene signatures enriched or repressed in Leukemic versus Control mice**

| <b>Control versus Leukemic</b> | <b>Gene Signatures Enriched in Leukemic</b>     | <b>Gene Signature Repressed in Leukemic</b>                              |
|--------------------------------|-------------------------------------------------|--------------------------------------------------------------------------|
| 1                              | Cell cycle mitotic                              | Immunoregulatory interactions between a lymphoid and a non-lymphoid cell |
| 2                              | Mitotic M – M/G Phases                          | Chemokine receptors and chemokines                                       |
| 3                              | Processing of capped intron containing pre-mRNA | Cytokine-cytokine receptor interaction                                   |
| 4                              | Spliceosome                                     | Hematopoietic cell lineage                                               |
| 5                              | Cell cycle checkpoints                          | Signaling in immune system                                               |
| 6                              | DNA replication pre initiation                  | Natural killer cell mediated cytotoxicity                                |
| 7                              | G1 – S transition                               | Cell adhesion molecules                                                  |
| 8                              | Formation and maturation of mRNA transcript     | Co-stimulation by the CD28 family                                        |
| 9                              | Mitotic prometaphase                            | Class A1 rhodopsin like receptors                                        |
| 10                             | S phase                                         | T cell receptor signaling pathway                                        |

**Supplementary Table 3. Patient Characteristics**

| Patient Number | Diagnosis      | Age | Sex | Mutation Type                      | Other Cytogenetics       |
|----------------|----------------|-----|-----|------------------------------------|--------------------------|
| 4              | CML            | 47  | M   | Missense<br>Frameshift<br>Missense | t(9;22)                  |
| 5              | CMML           | 77  | M   |                                    | Trisomy 8                |
| 8              | CLL            | 44  | M   |                                    |                          |
| 16             | CML            | 50  | F   |                                    | t(9;22)                  |
| 20             | CML            | 37  | F   |                                    | Abnormal                 |
| 22             | AML            | 86  | M   |                                    | Trisomy 8                |
| 23             | Mixed Leukemia | 65  | M   |                                    | t(9;22)                  |
| 27             | ALL            | 27  | F   | Missense                           | t(9;22)                  |
| 30             | CML            | 61  | M   |                                    | t(2;13)                  |
| 33             | APML           | 65  | M   |                                    | Trisomy 8<br>t(15;17)    |
| 36             | ALL            | 44  | F   |                                    | Abnormal                 |
| 37             | AML            | 81  | F   |                                    | Abnormal                 |
| 39             | AML            | 46  | F   |                                    | inv(16)                  |
| 40             | AML            | 37  | F   |                                    | Trisomy 8                |
| 41             | CML            | 81  | M   |                                    | t(9;22)                  |
| 45             | CML            | 73  | M   |                                    | Abnormal                 |
| 48             | CLL            | 59  | M   |                                    | del p53                  |
| 50             | CLL            | 62  | M   |                                    | Abnormal                 |
| 55             | CML            | 75  | F   |                                    | t(9;22)                  |
| 56             | AML            | 47  | M   |                                    | Normal                   |
| 59             | CML            | 64  | F   |                                    | t(9;22;14)               |
| 63             | AML            | 63  | M   |                                    | Trisomy 13<br>Trisomy 15 |
| 69             | CLL            | 60  | M   | Frameshift                         | del MYB(6q23)            |
| 73             | CMML           | 62  | M   |                                    | Normal                   |
| 74             | CLL            | 51  | M   | Frameshift                         | del 13q14                |
| 75             | AML            | 75  | M   |                                    | Normal                   |
| 82             | AML            | 55  | M   | Frameshift                         | t(9;22),<br>+8, +10      |
| 83             | AML            | 58  | M   |                                    | del(5)<br>-20            |
| 86             | AML            | 60  | F   | Missense                           | +8                       |
| 87             | CML            | 62  | F   |                                    | t(9;22)                  |
| 90             | MDS            | 21  | M   |                                    | del(20)                  |
| 91             | CLL            | 53  | M   |                                    | -13                      |
| 96             | ALL            | 55  | F   |                                    | t(9;22)                  |
| 99             | AML            | 75  | F   |                                    | Loss of RUNX1            |
| 101            | AML            | 53  | M   |                                    | Normal                   |
| 102            | ALL            | <21 | F   |                                    | Abnormal                 |
| 105            | AML            | <21 | M   | Frameshift                         | Abnormal                 |
| 106            | ALL            | 26  | M   | Frameshift                         | Abnormal                 |
| 113            | AML            | 59  | M   |                                    | Normal                   |
| 115            | AML            | 42  | M   |                                    | Abnormal                 |
| 118            | ALL            | 51  | M   | Missense<br>Missense               | Normal                   |
| 124            | AML            | 50  | M   | Missense<br>Missense<br>Missense   | Normal                   |
| 130            | ALL            | <21 | M   |                                    | Abnormal                 |
| 132            | CLL            | 64  | F   |                                    | Abnormal                 |
| 133            | AML            | <21 | F   |                                    | Abnormal                 |

**Supplementary Table 4. Variants occurring in patients with hematopoietic malignancies**

| Patient Number | Diagnosis                     | Age | Sex | Mutation Type | Mutation Position | Frequency of Detection | Damage Prediction | Other Cytogenetics |
|----------------|-------------------------------|-----|-----|---------------|-------------------|------------------------|-------------------|--------------------|
| 4              | CML                           | 47  | M   | Missense      | 26407808          | 14.4                   | 5/5               | t(9;22)            |
|                |                               |     |     | Frameshift    | 26417145          | 13.5                   | Truncated         |                    |
|                |                               |     |     | Missense      | 26430362          | 9.2                    | 5/5               |                    |
| 27             | ALL                           | 27  | F   | Missense      | 26322431          | 9.8                    | 0/5               | t(9;22)            |
| 69             | CLL                           | 60  | M   | Frameshift    | 26417145          | 12.9                   | Truncated         | del MYB(6q23)      |
| 74             | CLL                           | 51  | M   | Frameshift    | 26417145          | 12.3                   | Truncated         | del 13q14          |
| 82             | AML                           | 55  | M   | Frameshift    | 26417145          | 14.6                   | Truncated         | t(9;22)<br>+8,+10  |
| 86             | AML                           | 60  | F   | Missense      | 26431638          | 51.4                   | 2/5               | +8                 |
| 105            | AML                           | 8   | M   | Frameshift    | 2638008           | 9.9                    | Truncated         | Abnormal           |
| 106            | Pre B ALL                     | 26  | M   | Frameshift    | 26417145          | 12                     | Truncated         | Abnormal           |
| 118            | B Cell Leukemia /<br>Lymphoma | 51  | M   | Missense      | 26407811          | 11.6                   | 3/5               | Normal             |
|                |                               |     |     | Missense      | 26431614          | 13.6                   | 2/5               |                    |
| 124            | AML                           | 50  | M   | Missense      | 26426358          | 20                     | 5/5               | Normal             |
|                |                               |     |     | Missense      | 26431589          | 28.6                   | 4/5               |                    |
|                |                               |     |     | Missense      | 26432574          | 33.3                   | 3/5               |                    |

**Supplementary Table 5. Antibodies used in Flow Cytometry Analysis**

| <b>Antibody</b>  |                                                                                                                                                                    | <b>Fluorochrome</b>  | <b>Concentration</b>                |
|------------------|--------------------------------------------------------------------------------------------------------------------------------------------------------------------|----------------------|-------------------------------------|
| B220             | Pan B cell marker expressed from pro-B cells through mature B cells                                                                                                | Alexa Fluor 488      | 2 $\mu\text{g}$ per $10^6$ cells    |
| B220             | Pan B cell marker expressed from pro-B cells through mature B cells                                                                                                | APC/Cy7              | 1 $\mu\text{g}$ per $10^6$ cells    |
| BP-1             | Expressed on B cell progenitors                                                                                                                                    | Alexa Fluor 647      | 2 $\mu\text{g}$ per $10^6$ cells    |
| CD11b            | Expressed on granulocytes, monocytes, and macrophages                                                                                                              | PerCP/Cy5.5          | 0.25 $\mu\text{g}$ per $10^6$ cells |
| CD19             | Pan B cell marker expressed from pro-B cells through mature B cells                                                                                                | Alexa Fluor 647      | 0.25 $\mu\text{g}$ per $10^6$ cells |
| CD21             | Expressed on B cells, forming part of the B-cell antigen receptor complex                                                                                          | APC                  | 0.25 $\mu\text{g}$ per $10^6$ cells |
| CD23             | Expressed on mature B cells including follicular B cells                                                                                                           | PE/Cy7               | 0.05 $\mu\text{g}$ per $10^6$ cells |
| CD24             | Expressed on B cells                                                                                                                                               | Brilliant Violet 421 | 0.5 $\mu\text{l}$ per $10^6$ cells  |
| CD3              | Expressed on T cells and NK-T cells                                                                                                                                | PE                   | 0.25 $\mu\text{g}$ per $10^6$ cells |
| CD34             | Expressed on hematopoietic progenitors                                                                                                                             | PE                   | 0.25 $\mu\text{g}$ per $10^6$ cells |
| CD43             | Expressed on Pro-B cells                                                                                                                                           | APC                  | 0.25 $\mu\text{g}$ per $10^6$ cells |
| CD43             | Expressed on Pro-B cells                                                                                                                                           | PerCP/Cy5.5          | 0.2 $\mu\text{g}$ per $10^6$ cells  |
| CD45             | Leukocyte common antigen, expressed on all hematopoietic cells except platelets and red cells                                                                      | APC/Cy7              | 0.25 $\mu\text{g}$ per $10^6$ cells |
| CD5              | Expressed on a subset of B cells, called B-1 cells and T cells                                                                                                     | Alexa Fluor 488      | 0.25 $\mu\text{g}$ per $10^6$ cells |
| Gr1              | Expressed on mature granulocytes                                                                                                                                   | PE/Cy7               | 0.05 $\mu\text{g}$ per $10^6$ cells |
| IgM              | Expressed on immature and mature B cells                                                                                                                           | Brilliant Violet 421 | 5 $\mu\text{l}$ per $10^6$ cells    |
| IgD              | Expressed on mature B cells                                                                                                                                        | PerCP/Cy5.5          | 0.25 $\mu\text{g}$ per $10^6$ cells |
| IgD              | Expressed on mature B cells                                                                                                                                        | APC                  |                                     |
| IL-7R $\alpha$   | Expressed on common lymphocyte progenitors                                                                                                                         | Alexa Fluor 647      | 1 $\mu\text{g}$ per $10^6$ cells    |
| Lineage Cocktail | Includes antibodies reacting to cells from the major hematopoietic cell lineages including B cells, T cells, granulocytes, macrophages, NK cells, and erythrocytes | Brilliant Violet 421 | 20 $\mu\text{l}$ per $10^6$ cells   |

**Supplementary Table 6. Primers and conditions for qRT-PCR**

---

| <b>Gene</b> | <b>Primer sequences</b>                                            |
|-------------|--------------------------------------------------------------------|
| Igll1       | forward 5' CCAAGGGAAGAAGATGCTGA<br>reverse 5' ACGTCTGCCTGCTCATGC   |
| Enpep       | forward 5' TTCATGGTCAGTGGCAGCTA<br>reverse 5' GTTTAAAGGCTGGCTGAACG |
| Rag1        | forward 5' CTGAAGCTCAGGGTAGACGG<br>reverse 5' CAACCAAGCTGCAGACATTC |
| VpreB1      | forward 5' TGCTCAGGGTACAGGAGAGG<br>reverse 5' GCTGCTGGCCTATCTCACAG |
| VpreB3      | forward 5' AGCTGAGATGAGCGTCTTGG<br>reverse 5' CCTGCCTCTGCTCCTGATAG |
| Myb         | forward 5' GTCCTCTGTCTTCCCACAGG<br>reverse 5' TGCCTCAAAGCCTTTACCG  |
| Ebf1        | forward 5' AGGCAATTTTGGTTGCATTT<br>reverse 5' TGACAAGAAAAGCTGTGGCA |
| E2A         | forward 5' AAGGAGGAGCTGCTCTGGTC<br>reverse 5' CTCAGCATGATGTTCCCG   |
| CD7         | forward 5' GTTGACAGAATCCCCCTCAG<br>reverse 5' TGGCTTTGCTGCTTACTCTG |
| Ccr9        | forward 5' CATGCCAGGAATAAGGCTTG<br>reverse 5' ACTCACCTCCGCCGTACAT  |
| GAPDH       | forward 5' TTGATGGCAACAATCTCCAC<br>reverse 5' CGTCCCGTAGACAAAATGGT |

---

PCR conditions were: 95°C, 58°C, 72°C, 40 cycles, except for Igll1 and Ccr9 which required annealing at 59°C and 60°C respectively.
